# Supplementary material for: Pooling annotated corpora for clinical concept extraction
Source: PubMed Central journal article supplement (PMC3599895; doi:10.1186/2041-1480-4-3), 2013-01-08
Supplement: 2041-1480-4-3-S1.pdf [file 2041-1480-4-3-S1.pdf]

**Appendix- table for Figure 1**

| Measure   | Test Set Evaluation | MCR  | i2b2 | MCR+i2b2 |
|-----------|---------------------|------|------|----------|
| F1        | MCR-O               | 0.82 | 0.74 | 0.79     |
| F1        | MCR-E               | 0.58 | 0.38 | 0.46     |
| F1        | i2b2-O              | 0.67 | 0.89 | 0.88     |
| F1        | i2b2-E              | 0.40 | 0.79 | 0.75     |
| Precision | MCR-O               | 0.90 | 0.71 | 0.76     |
| Precision | MCR-E               | 0.68 | 0.38 | 0.46     |
| Precision | i2b2-O              | 0.83 | 0.91 | 0.90     |
| Precision | i2b2-E              | 0.50 | 0.81 | 0.78     |
| Recall    | MCR-O               | 0.74 | 0.77 | 0.81     |
| Recall    | MCR-E               | 0.51 | 0.38 | 0.46     |
| Recall    | i2b2-O              | 0.56 | 0.87 | 0.85     |
| Recall    | i2b2-E              | 0.33 | 0.77 | 0.72     |

**Appendix- table for Figure 3**

| Measure   | Eval_type | MCR  | i2b2 | i2b2C | MCR+i2b2 | MCR+i2b2C |
|-----------|-----------|------|------|-------|----------|-----------|
| F1        | O         | 0.82 | 0.74 | 0.74  | 0.79     | 0.80      |
| F1        | E         | 0.58 | 0.38 | 0.42  | 0.46     | 0.52      |
| Precision | O         | 0.90 | 0.71 | 0.70  | 0.76     | 0.79      |
| Precision | E         | 0.68 | 0.38 | 0.42  | 0.46     | 0.52      |
| Recall    | O         | 0.74 | 0.77 | 0.78  | 0.81     | 0.82      |
| Recall    | E         | 0.51 | 0.38 | 0.42  | 0.46     | 0.51      |

Appendix- table for Figure 4

| Measure   | MCR size | MCR  |      | MCR+i2b2 |      | MCR+i2b2C |      |
|-----------|----------|------|------|----------|------|-----------|------|
|           |          | E    | O    | E        | O    | E         | O    |
| F1        | 20       | 0.42 | 0.64 | 0.39     | 0.75 | 0.44      | 0.74 |
| F1        | 40       | 0.47 | 0.72 | 0.39     | 0.75 | 0.48      | 0.77 |
| F1        | 60       | 0.52 | 0.76 | 0.43     | 0.77 | 0.49      | 0.79 |
| F1        | 80       | 0.54 | 0.79 | 0.44     | 0.78 | 0.49      | 0.79 |
| F1        | 100      | 0.56 | 0.80 | 0.43     | 0.77 | 0.50      | 0.79 |
| F1        | 120      | 0.57 | 0.80 | 0.44     | 0.78 | 0.50      | 0.79 |
| F1        | 140      | 0.58 | 0.81 | 0.45     | 0.78 | 0.51      | 0.80 |
| F1        | 160      | 0.58 | 0.82 | 0.47     | 0.79 | 0.52      | 0.80 |
| Precision | 20       | 0.64 | 0.89 | 0.39     | 0.73 | 0.43      | 0.70 |
| Precision | 40       | 0.63 | 0.90 | 0.40     | 0.74 | 0.48      | 0.74 |
| Precision | 60       | 0.66 | 0.91 | 0.43     | 0.75 | 0.49      | 0.77 |
| Precision | 80       | 0.66 | 0.90 | 0.45     | 0.76 | 0.49      | 0.77 |
| Precision | 100      | 0.68 | 0.91 | 0.43     | 0.75 | 0.50      | 0.77 |
| Precision | 120      | 0.68 | 0.90 | 0.45     | 0.76 | 0.51      | 0.77 |
| Precision | 140      | 0.68 | 0.91 | 0.46     | 0.77 | 0.52      | 0.79 |
| Precision | 160      | 0.69 | 0.91 | 0.48     | 0.78 | 0.53      | 0.79 |
| Recall    | 20       | 0.31 | 0.50 | 0.39     | 0.78 | 0.45      | 0.78 |
| Recall    | 40       | 0.37 | 0.60 | 0.38     | 0.77 | 0.48      | 0.81 |
| Recall    | 60       | 0.43 | 0.66 | 0.42     | 0.79 | 0.49      | 0.82 |
| Recall    | 80       | 0.46 | 0.71 | 0.44     | 0.79 | 0.49      | 0.81 |
| Recall    | 100      | 0.48 | 0.71 | 0.42     | 0.79 | 0.49      | 0.81 |
| Recall    | 120      | 0.49 | 0.73 | 0.44     | 0.80 | 0.50      | 0.82 |
| Recall    | 140      | 0.50 | 0.74 | 0.44     | 0.79 | 0.50      | 0.81 |
| Recall    | 160      | 0.51 | 0.74 | 0.46     | 0.81 | 0.51      | 0.81 |
